# Supplementary material for: Characterization of the Chloroplast Genome of Argyranthemum frutescens and a Comparison with Other Species in Anthemideae
Source: MDPI journal article supplement (doi:10.3390/genes13101720), 2022-09-25
Supplement: s1 [file s1]

Characterization of the chloroplast genome of *Argyranthemum frutescens* and a comparison with other species in Anthemideae

Yiran Zhao, Danyue Qu, Yueping Ma\*

College of Life and Health Sciences, Northeastern University, Shenyang, 110004, China

\* Correspondence: Yueping Ma, [mypluna@sina.com](mailto:mypluna@sina.com)

Table S1. Codon usage in chloroplast genome of *Argyranthemum frutescens*.

| AA  | codon | Freq | RSCU | AA  | codon | Freq | RSCU |
|-----|-------|------|------|-----|-------|------|------|
| Phe | UUU   | 957  | 1.32 | Ser | UCU   | 576  | 1.76 |
|     | UUC   | 495  | 0.68 |     | UCC   | 315  | 0.96 |
| Leu | UUA   | 872  | 1.89 | Pro | UCA   | 395  | 1.21 |
|     | UUG   | 554  | 1.2  |     | UCG   | 153  | 0.47 |
|     | CUU   | 616  | 1.33 |     | CCU   | 435  | 1.58 |
|     | CUC   | 182  | 0.39 |     | CCC   | 185  | 0.67 |
|     | CUA   | 357  | 0.77 |     | CCA   | 320  | 1.16 |
| Ile | CUG   | 189  | 0.41 | Thr | CCG   | 160  | 0.58 |
|     | AUU   | 1076 | 1.47 |     | ACU   | 527  | 1.63 |
|     | AUC   | 427  | 0.58 |     | ACC   | 238  | 0.74 |
|     | AUA   | 696  | 0.95 |     | ACA   | 404  | 1.25 |
|     | AUG   | 612  | 1    |     | ACG   | 123  | 0.38 |
| Val | GUU   | 491  | 1.45 | Ala | GCU   | 607  | 1.72 |
|     | GUC   | 166  | 0.49 |     | GCC   | 222  | 0.63 |
|     | GUA   | 520  | 1.53 |     | GCA   | 414  | 1.17 |
|     | GUG   | 180  | 0.53 |     | GCG   | 168  | 0.48 |
| Tyr | UAU   | 800  | 1.64 | TER | UAA   | 49   | 1.73 |
|     | UAC   | 176  | 0.36 |     | UAG   | 21   | 0.74 |
| Cys | UGU   | 196  | 1.37 | Trp | UGA   | 15   | 0.53 |
|     | UGC   | 90   | 0.63 |     | UGG   | 447  | 1    |
| His | CAU   | 449  | 1.52 | Arg | CGU   | 338  | 1.33 |
|     | CAC   | 143  | 0.48 |     | CGC   | 100  | 0.39 |
| Gln | CAA   | 705  | 1.51 |     | CGA   | 339  | 1.33 |
|     | CAG   | 229  | 0.49 |     | CGG   | 116  | 0.45 |
| Asn | AAU   | 975  | 1.56 | Ser | AGU   | 403  | 1.23 |
|     | AAC   | 276  | 0.44 |     | AGC   | 120  | 0.37 |
| Lys | AAA   | 1021 | 1.49 | Arg | AGA   | 470  | 1.84 |
|     | AAG   | 347  | 0.51 |     | AGG   | 167  | 0.65 |
| Asp | GAU   | 835  | 1.59 | Gly | GGU   | 580  | 1.32 |
|     | GAC   | 213  | 0.41 |     | GGC   | 187  | 0.42 |
| Glu | GAA   | 987  | 1.5  |     | GGA   | 689  | 1.57 |
|     | GAG   | 331  | 0.5  |     | GGG   | 305  | 0.69 |

Table S2. Putative RNA Editing Sites of *Argyranthemum frutescens* chloroplast genome.

| CDS          | Nt Pos | AA Pos | Align Col | Effect             | Score |
|--------------|--------|--------|-----------|--------------------|-------|
| <i>matK</i>  | 284    | 95     | 108       | TCT (S) => TTT (F) | 0.86  |
|              | 637    | 213    | 229       | CAT (H) => TAT (Y) | 1     |
|              | 1240   | 414    | 430       | CAT (H) => TAT (Y) | 1     |
| <i>rpoB</i>  | 983    | 328    | 345       | GCT (A) => GTT (V) | 1     |
| <i>rpoC1</i> | 511    | 171    | 171       | CCC (P) => TCC (S) | 1     |
|              | 802    | 268    | 284       | CGT (R) => TGT (C) | 1     |
|              | 1592   | 531    | 548       | GCA (A) => GTA (V) | 0.86  |
| <i>rpoC2</i> | 2045   | 682    | 710       | CCA (P) => CTA (L) | 1     |
|              | 1960   | 654    | 835       | CTT (L) => TTT (F) | 0.83  |
|              | 2725   | 909    | 1106      | CCC (P) => TCC (S) | 1     |
| <i>rps2</i>  | 3716   | 1239   | 1454      | TCG (S) => TTG (L) | 0.86  |
|              | 248    | 83     | 83        | TCA (S) => TTA (L) | 1     |
|              | 629    | 210    | 213       | TCG (S) => TTG (L) | 1     |
| <i>atpI</i>  | 773    | 258    | 258       | TCA (S) => TTA (L) | 1     |
| <i>atpA</i>  | 773    | 258    | 258       | TCA (S) => TTA (L) | 1     |
| <i>rps14</i> | 80     | 27     | 27        | TCA (S) => TTA (L) | 1     |
|              | 149    | 50     | 53        | CCA (P) => CTA (L) | 1     |
| <i>atpB</i>  | 1469   | 490    | 496       | TCG (S) => TTG (L) | 1     |
| <i>accD</i>  | 125    | 42     | 42        | ACG (T) => ATG (M) | 1     |
|              | 301    | 101    | 132       | CCT (P) => TCT (S) | 1     |
|              | 1162   | 388    | 450       | CCA (P) => TCA (S) | 1     |
|              | 1370   | 457    | 519       | CCT (P) => CTT (L) | 1     |
| <i>psbL</i>  | 2      | 1      | 1         | ACG (T) => ATG (M) | 1     |
| <i>psbF</i>  | 77     | 26     | 26        | TCT (S) => TTT (F) | 1     |
| <i>petG</i>  | 14     | 5      | 5         | TCT (S) => TTT (F) | 0.86  |
| <i>petB</i>  | 418    | 140    | 140       | CGG (R) => TGG (W) | 1     |
|              | 611    | 204    | 204       | CCA (P) => CTA (L) | 1     |
| <i>petD</i>  | 305    | 102    | 102       | GCT (A) => GTT (V) | 0.86  |
| <i>rpoA</i>  | 824    | 275    | 279       | TCA (S) => TTA (L) | 1     |
| <i>ndhB</i>  | 149    | 50     | 50        | TCA (S) => TTA (L) | 1     |
|              | 259    | 87     | 87        | CTT (L) => TTT (F) | 1     |
|              | 467    | 156    | 156       | CCA (P) => CTA (L) | 1     |
|              | 586    | 196    | 196       | CAT (H) => TAT (Y) | 1     |
|              | 611    | 204    | 204       | TCA (S) => TTA (L) | 0.8   |
|              | 737    | 246    | 246       | CCA (P) => CTA (L) | 1     |
|              | 746    | 249    | 249       | TCT (S) => TTT (F) | 1     |
|              | 830    | 277    | 277       | TCA (S) => TTA (L) | 1     |
|              | 836    | 279    | 279       | TCA (S) => TTA (L) | 1     |
|              | 1481   | 494    | 494       | CCA (P) => CTA (L) | 1     |

|             |      |     |     |                    |      |
|-------------|------|-----|-----|--------------------|------|
| <i>ndhA</i> | 107  | 36  | 36  | CCT (P) => CTT (L) | 1    |
|             | 566  | 189 | 189 | TCA (S) => TTA (L) | 1    |
|             | 1073 | 358 | 358 | TCC (S) => TTC (F) | 1    |
| <i>ndhG</i> | 166  | 56  | 56  | CAT (H) => TAT (Y) | 0.8  |
|             | 314  | 105 | 105 | ACA (T) => ATA (I) | 0.8  |
| <i>ndhD</i> | 2    | 1   | 1   | ACG (T) => ATG (M) | 1    |
|             | 383  | 128 | 128 | TCG (S) => TTG (L) | 1    |
|             | 599  | 200 | 200 | TCA (S) => TTA (L) | 1    |
|             | 878  | 293 | 293 | TCA (S) => TTA (L) | 1    |
|             | 887  | 296 | 296 | CCC (P) => CTC (L) | 1    |
| <i>ccsA</i> | 1310 | 437 | 437 | TCA (S) => TTA (L) | 0.8  |
|             | 110  | 37  | 39  | CCA (P) => CTA (L) | 0.86 |
|             | 370  | 124 | 127 | CCC (P) => TCC (S) | 0.86 |
| <i>ndhF</i> | 290  | 97  | 97  | TCA (S) => TTA (L) | 1    |
| <i>ndhB</i> | 149  | 50  | 50  | TCA (S) => TTA (L) | 1    |
|             | 259  | 87  | 87  | CTT (L) => TTT (F) | 1    |
|             | 467  | 156 | 156 | CCA (P) => CTA (L) | 1    |
|             | 586  | 196 | 196 | CAT (H) => TAT (Y) | 1    |
|             | 611  | 204 | 204 | TCA (S) => TTA (L) | 0.8  |
|             | 737  | 246 | 246 | CCA (P) => CTA (L) | 1    |
|             | 746  | 249 | 249 | TCT (S) => TTT (F) | 1    |
|             | 830  | 277 | 277 | TCA (S) => TTA (L) | 1    |
|             | 836  | 279 | 279 | TCA (S) => TTA (L) | 1    |
|             | 1481 | 494 | 494 | CCA (P) => CTA (L) | 1    |

---

Note: Nt Pos shows the location of the nucleotide predicted to be edited in the input DNA sequence. AA Pos means the location of the amino acid predicted to be edited in the translation of the input DNA sequence. Align Col indicates the column in the AA alignment where the edit site occurs. Effect shows the codon and the encoded amino acid before and after editing. The prediction score is a value ranging from 0 to 1 and a higher value indicates more confidence.

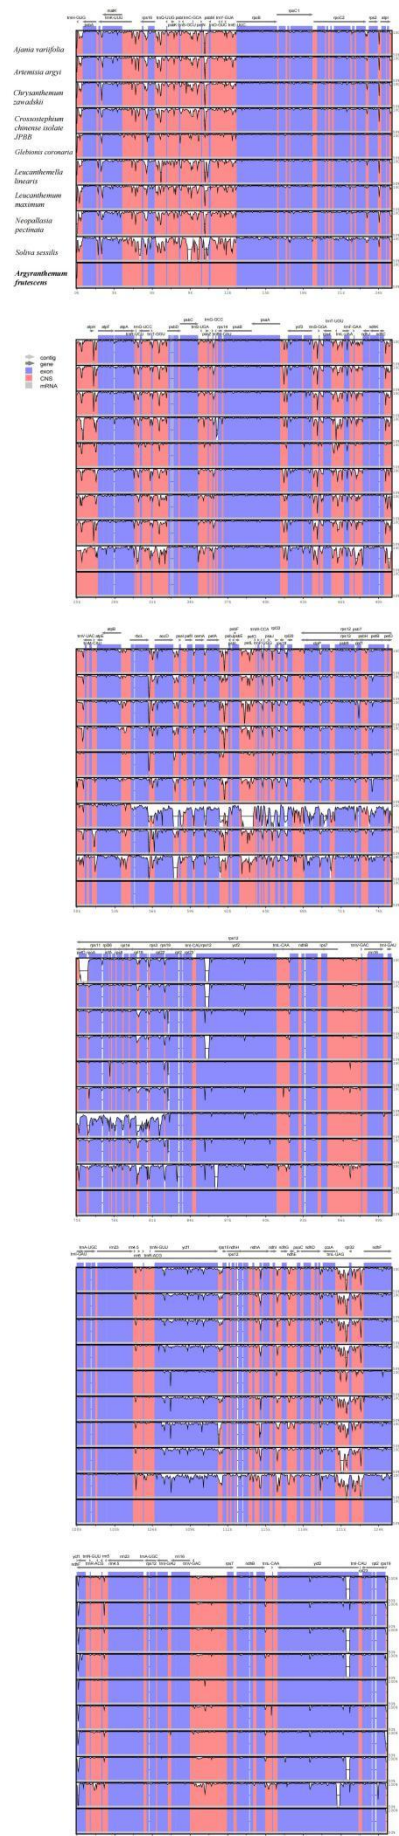

Figure S1. Sequence identity plots of the 10 Anthemideae chloroplast genomes generated by mVISTA. The vertical and horizontal axes in the figure represent the consistency degree of the sequences from 50% to 100% and the sequence length, respectively.
